1 **Abandonment and restoration of Mediterranean meadows:**  
2 **long-term effects on a butterfly-plant network**

3

4 Pau Colom<sup>1</sup>, Anna Traveset<sup>1</sup>, Constantí Stefanescu<sup>2,3</sup>

5 <sup>1</sup>Institut Mediterrani d'Estudis Avançats (IMEDEA-CSIC-UIB), Global Change Research Group. Miquel Marqués  
6 21, 07190 (Esporles, Illes Balears), Spain.

7 <sup>2</sup>Granollers Natural Sciences Museum, Francesc Macià 51, 08402 (Granollers, Barcelona), Spain.

8 <sup>3</sup>Centre de Recerca Ecològica i Aplicacions Forestals (CREAF-CSIC-UAB), Universitat Autònoma de Barcelona,  
9 08193, (Cerdanyola de Vallès, Barcelona), Spain.

10 pau.colom.montojo@gmail.com, +34662219748

11 ORCID: 0000-0001-8952-7869

12

13

14 **Abstract**

15

16 Both the intensification and abandonment of traditional agricultural practices are known to be major  
17 threats to biodiversity worldwide, above all in industrialized countries. Although land abandonment in  
18 particular has a negative effect on the diversity of both plant and insect communities, few studies have  
19 ever analysed these two groups together and none has yet examined the effect on plant-insect interactions  
20 using a network approach. In view of the notable decline of pollinator insects reported in past decades, it  
21 is essential to understand how the structure of a plant-pollinator network changes during the ecological  
22 succession that occurs as traditionally managed habitats are abandoned, and to what extent this network is  
23 re-established when habitats are restored. We monitored a butterfly-plant network for 22 years in habitats  
24 where land abandonment and restoration have taken place and were able to compare restoration by  
25 grazing with restoration combining mowing and grazing. Abandonment leads to significant reductions in  
26 the cover of typical grasslands plants and, in turn, rapidly provokes changes in butterfly assemblages and  
27 plant interactions. Specifically, it caused a replacement of multivoltine by monovoltine species,  
28 increasing network specialization due to the great specificity in the interactions that monovoltine species  
29 established with plants. Changes in butterfly communities were also recorded in a nearby unaltered

30 habitat due to the metapopulation structure of some species. A highly dynamic source-sink system was  
31 established between managed and unmanaged habitat patches, which ultimately allowed the  
32 metapopulations to persist. Restoration combining mowing and grazing promoted a quick return to the  
33 pre-abandonment situation in the butterfly community, and also increased generality and nestedness, two  
34 network descriptors that are known to enhance community stability.

35

36

37 **Keywords** semi-natural habitats; plant-pollinator network; grassland management;  
38 Lepidoptera; life-history traits; network stability; Mediterranean basin.

39

## 40 **Introduction**

41

42 Many of the most biodiverse systems of high ecological value in industrialized areas are the product  
43 of the development of traditional human agricultural practices (Di Giulio et al., 2001; Tschamtkke et al.,  
44 2005; Kleijn et al., 2009, 2011; Blondel et al., 2010). However, many are now threatened by two  
45 contrasting phenomena, namely, agricultural intensification and abandonment (Donald et al., 2001;  
46 Briggs et al., 2005; Cramer et al., 2008; Kehoe et al., 2017; Zabel et al., 2019).

47 Numerous studies have found that grasslands managed by either mowing or grazing maintain a greater  
48 diversity of plant species than those that are abandoned or, by contrast, are subject to intense management  
49 (Poschlod & WallisDeVries, 2002; Pykälä et al., 2005). Disturbance caused by mowing or grazing causes  
50 an intermediate scenario that allows the least competitive species to survive, thereby favouring greater  
51 plant co-existence (Zobel et al., 1996). The literature describes an increase in insect species diversity at  
52 the beginning of the succession when meadows are abandoned or management intensity is reduced (Pöyry  
53 et al., 2006; Öckinger et al., 2006). The reason for this seems to be that taller but also structurally more  
54 diverse vegetation (i.e. increased diversity of turf heights) initially allows more diverse insect  
55 communities to thrive (Kruess & Tschamtkke, 2002). Then, as ecological succession advances and shrub  
56 vegetation and trees encroach, diversity generally decreases, as has clearly been demonstrated in several  
57 butterfly studies (e.g. Balmer & Erhardt, 2000; Öckinger et al., 2006). In the Mediterranean region, where  
58 most species of butterflies show a strong preference for open habitats, afforestation resulting from the  
59 abandonment of traditional agricultural practices (Feranec et al., 2010) has been identified as one of the  
60 main factors driving population declines (Slancarova et al., 2016; Herrando et al., 2016; Ubach et al.,  
61 2019).

62 In conjunction, these studies have led to a broad consensus that, at least in Europe, a significant loss of  
63 biodiversity can be attributed to the abandonment of semi-natural meadows. This, in turn, has encouraged  
64 the recovery of such habitats via the restoration of traditional practices (Pykälä, 2003; Pöyry et al., 2005;  
65 Öckinger et al., 2006). However, restoring former management practices does not necessarily lead to an  
66 immediate return to the semi-natural state of the habitat prior to abandonment (Dover et al., 2011).  
67 Depending on the duration of the abandonment, it may take a long time for meadows to return to their  
68 former states (Rook et al., 2004). Moreover, the effects of the restoration on both plant and butterfly  
69 communities will depend on the type and the frequency of the management. Some studies suggest that the

70 best results are obtained via grazing rather than mowing (Tälle et al., 2015, 2016), while others advocate  
71 an intermediate frequency (Bakker & Berendse, 1999; Watkinson & Ormerod, 2001). In addition, habitat  
72 recovery may depend on the type of grazer, since grazing by cows and horses in some cases has positive  
73 effects on plant and insect species richness, while grazing by sheep has been reported to have negative  
74 effects (Carvell, 2002; Öckinger et al., 2006).

75 In view of the notable decline in populations of insect pollinators in recent decades (Potts et al., 2010)  
76 and the valuable services they offer agriculture (Klein et al, 2007), important efforts are being made to  
77 understand how abandonment could affect this group. Specifically, the effects of abandonment and the  
78 restoration of grasslands have been studied in vascular plants (Meiners et al., 2001; Pruchniewicz, 2017;  
79 Uchida et al., 2018), insects (Erhardt, 1985; Marini et al., 2009; Dover et al., 2011) and in both groups  
80 simultaneously (Steffan-Dewenter & Leschke, 2003; Pöyry et al., 2006; Uchida & Ushimaru, 2015),  
81 although in the latter case, as far as we know, no network approach has been used. This approach is  
82 important because the presence of members of two interacting groups does not necessarily mean that their  
83 interactions are also restored. Given the importance of interactions between species in the functioning of  
84 ecosystems (Kremen, 2005), it is essential to understand not only the changes that occur in plant and  
85 insect communities independently of one another, but also the changes in the interactions occurring  
86 between these two groups. Also of importance are trends in network structures in the long term during  
87 periods of abandonment and restoration of semi-natural habitats (e.g. Olesen et al., 2008, 2011).

88 This work aimed to analyse the long-term effects of abandonment and the subsequent restoration of  
89 plant and butterfly communities in the same semi-natural meadows over a period of two decades.  
90 Specifically, we investigated how butterflies and their nectar plants respond to changes provoked by  
91 abandonment and, subsequently, to two different types of restoration. This study of both processes  
92 embraces analyses of habitat changes and their effects on species composition and population dynamics.  
93 Moreover, for the first time, we employed network analyses to understand the effects of abandonment and  
94 restoration on butterfly-plant interactions at community level.

## 95 **Material and methods**

96

### 97 *Study site*

98 Data were obtained from a system of traditionally managed meadows prone to flooding, where some  
99 of the effects of abandonment on both butterfly and plant communities have been reported in a previous  
100 study (Stefanescu et al., 2009). In the study area, a 1.1-km transect was established and divided into six  
101 sections (117–286-m long), each in a different meadow; sections were separated from each other by  
102 ditches or trees (see appendix A; Fig. 1).

103 Over a period of 22 years (1997–2018) these meadows underwent important changes in management  
104 practices. In the first two years, all six sections were managed traditionally, either by mowing (sections 1,  
105 2, 5) or by a combination of grazing and mowing (sections 3, 4, 6). In 1999, sections 1–5 were abandoned  
106 (i.e. they were no longer grazed or mown), while section 6, which was managed as before (i.e. by mowing  
107 and grazing) throughout the whole study period, acted as a control (see appendix A; Fig. 2). Traditional  
108 management using grazing and mowing was restored in 2005 in all abandoned meadows (except section  
109 1, which was only grazed). This type of management has continued up to the present day.

110

### 111 *Data sampling*

112 The butterfly populations of this area have been monitored since 1997 within the framework of the  
113 Catalan Butterfly Monitoring Scheme (<[www.catalanbms.org](http://www.catalanbms.org)>). Butterfly individuals were counted  
114 following a standardized methodology: from the first week of March to the last week of September  
115 weekly samplings along a walked transect were taken at distances of 2.5 m on both the sides and 5 m  
116 ahead of the recorder (Pollard & Yates, 1993). Based on these counts, annual indices of relative  
117 abundances per species were calculated to evaluate population trends during the study period. Abundance  
118 values were standardized per 100 m of section length. The interactions and their frequency (i.e. number of  
119 floral visits) between butterflies and their nectar plants were also recorded. These records only include  
120 butterflies that were actually seen to feed on nectar with their proboscis clearly extended. All interaction  
121 data were arranged in annual bipartite matrices.

122 In 2000 for the first time, plant communities were characterized following the CORINE Land Cover  
123 manual and then repeated every six years. This vegetation monitoring thus provides information  
124 regarding which plant communities were dominant in the meadows in the first year after the abandonment

125 (2000), in the year after management recovery (2006), and in two subsequent monitoring periods (2012  
126 and 2018).

127

128 *Data analysis*

129 Ecological descriptors

130 The combination of data on butterflies and flowering plants was used to characterize ecological  
131 changes during the study period. The following five ecological descriptors (hereafter EDs) were  
132 calculated annually for each section: (1) Butterfly abundance; (2) Butterfly species richness; (3) Butterfly  
133 diversity (calculated using the Shannon-Wiener index); (4) Flower visits (i.e. total number of flower  
134 visits); and (5) Plant species richness (i.e. number of species of flowering plants visited by butterflies).  
135 Trends over time in the EDs in the different sections and periods were analysed using linear models.  
136 Differences in the ED trends between managed (control section #6) and abandoned (#1–5) sections during  
137 the abandonment period, and between the two types of restoration (only-grazed section 1 vs.  
138 mown/grazed sections 2-5) were analysed using Generalised Linear Models (GLM).

139

140 Butterfly and nectar-plant species composition

141 For the analysis of plant species composition (i.e. flowering plants visited by butterflies), all sections  
142 were pooled due to the limited number of recorded flower-butterfly interactions in some years at section  
143 level. Bray-Curtis dissimilarity indices were used to measure changes in composition between  
144 abandonment and management periods. The same indices were used to analyse changes in the  
145 composition of butterfly communities by comparing each section and year with the initial community (i.e.  
146 in 1997, the first year). Temporal trends in dissimilarity values were then calculated using linear models  
147 for the three different periods of the study, including as a reference value the year previous to the change  
148 of management type: (1) abandonment of sections 1–5 (1998–2004); (2) recovery of traditional  
149 management in sections 1–5 (2004–2018); and (3) the whole study period (1997-2018). PERMANOVA  
150 analysis and NMDS plots were also conducted to test for possible differences in species composition  
151 between periods and sections. SIMPER analysis (Clarke, 1993) was additionally used to identify the  
152 species that contributed most to the total dissimilarity between abandonment and restoration periods.

153

154 Butterfly population trends related to ecological and life history traits

155 We tested whether butterfly population trends (measured as changes in the annual indices of relative  
156 abundance) could be explained by species traits during the two study periods (abandonment and  
157 management). The selected ecological and life-history traits of the butterflies were: (a) wing length (wing  
158 span, from García-Barros et al., 2013); (b) mobility according to a categorical index with five classes (0 =  
159 populations showing very little dispersal; 1 = closed populations and more frequent dispersal; 2 = closed  
160 populations and very frequent dispersal; 3 = open populations and non-directional dispersal; and 4 = open  
161 populations and directional migration; see Stefanescu et al., 2005, 2009); (c) overwintering stage (egg,  
162 larva, pupa, adult, or no overwintering stage); (d) host-plant specialization as a larva (i.e. monophagous,  
163 oligophagous or polyphagous); (e) voltinism (i.e. number of generations per year: monovoltine, bivoltine  
164 or multivoltine). Life-history data were extracted from García-Barros et al. (2013), Vila et al. (2018) and  
165 personal observations by one of the authors (CS).

166

167 Network analysis

168 To evaluate the temporal dynamics of the butterfly-plant interactions over the study period, we  
169 calculated different network-level indices commonly used in network analysis with the *bipartite* package  
170 in R version 3.6.3 (Dormann et al., 2009). Specifically, specialization index ( $H_2'$ ), modularity and the  
171 nestedness (WNOF) of the network were obtained annually for the whole set of abandoned meadows (i.e.  
172 excluding the control section); sections were pooled due to the low number of visits per section per year.  
173 Generalized Additive Models (GAM) were used to analyse the trends of indices during the abandonment-  
174 restoration succession.

175

176 **Results**

177

178 *Habitat changes related to meadow management*

179 Despite the lack of data on plant community composition prior to abandonment, important changes  
180 were observed between 2000 and 2006 as a result of the cessation of grazing and mowing. By 2000 (i.e.  
181 one year after abandonment), Mediterranean grasslands with *Gaudinia fragilis* and *Brachypodium*  
182 *phoenicoides* dominated the entire transect. Other species such as *Euphorbia serrata* and *Galium lucidum*,  
183 and typical wetland species such as *Scirpus holoschoenus*, were also abundant. In the period 2000–2006,  
184 however, Mediterranean grassland cover fell by  $36\pm 18\%$  in the abandoned sections. Once the traditional  
185 management was restored, this habitat type increased again ( $24\pm 26\%$ ) in those sections where mowing  
186 and grazing were combined. By contrast, the grassland community continued to decline (12% fall in  
187 2006–2012) in the only-grazed section until it had completely disappeared by 2018 (see appendix A: Fig.  
188 3). In this section, the grassland community was almost completely replaced by riparian woodland  
189 (mainly *Fraxinus angustifolia* and *Ulmus minor*; 50% of the coverage in 2018). Such notable increase in  
190 the riparian woodland coverage only occurred in one meadow restored by both mowing and grazing (#4),  
191 where a stand of *Populus alba* established itself (40% of coverage after abandonment and 60% after  
192 restoration). Although management never ceased in the control section (#6), this meadow became  
193 severely ruderalized (11% in 2000 vs. 90% in 2018 of ruderal habitat coverage), probably due to  
194 overgrazing by horses (see appendix A; Fig. 3). Indeed, the annual number of episodes of grazing and  
195 mowing in the control section was greater than in any other section ( $3.36$  vs.  $2.2 \pm 0.3$ ) (see appendix A:  
196 Fig. 2).

197

198 *Trends in ecological descriptors*

199 During the whole of the study period the only-grazed section (#1) was the only meadow that showed  
200 significant temporal trends in all EDs (Table 1; see appendix A: Fig. 4). Butterfly diversity declined  
201 significantly during the abandonment period in this section, and butterfly abundance, butterfly species  
202 richness, total number of flower visits and plant species richness showed negative but non-significant  
203 trends. After management was restored in 2005, differences between the two types of restoration became  
204 patent since the richness and diversity of butterflies and the number of flower visits decreased in the only-  
205 grazed section (#1) but increased or remained stable in the mown-grazed sections (#2-5). Differences



206 between managed and abandoned sections were observed only in the number of visited plants, for which  
207 only the control showed a great increase in the richness of visited plants during abandonment. Despite  
208 being constantly managed over all the years of the study, the control section showed significant negative  
209 trends in butterfly richness and diversity for the whole period. During the abandonment of the other  
210 sections butterfly and plant abundance and richness of visited plants increased in the control section,  
211 although the same EDs decreased significantly once management was restored.

212

### 213 *Changes in butterfly and flowering plant community structures*

214 During the 22 study years significant changes occurred in butterfly communities with respect to the  
215 control year (1997). Such changes were observed not only in the only-grazed section (#1) but also in the  
216 control section (#6), although the trend was much more marked in the former ( $R^2 = 0.73$  vs.  $R^2 = 0.18$ ,  
217 respectively) (Fig. 1). During the abandonment period, butterfly communities changed significantly in all  
218 sections (Fig. 1, appendix A: Table 1). However, after management was restored, the only-grazed section  
219 (#1) was the only one in which butterfly communities became increasingly more dissimilar relative to the  
220 control year. By contrast, in the mowing-grazing sections the dissimilitude values decreased after  
221 management was restored, indicating a return to the initial state of the communities prior to abandonment.

222 The temporal trends in butterfly and flowering plant composition were confirmed by PERMANOVA  
223 and NMDS analyses (Fig. 2, appendix A: Table 2). Butterfly communities during the abandonment period  
224 differed significantly from those during the restoration period (Fig. 2). These analyses further showed  
225 differences between the two types of restoration, as only the grazing-restored section (#1) showed  
226 significant differences between the prior to abandonment, abandonment and restoration periods. By  
227 contrast, the mowing-grazing sections (#2-5) did not show any significant differences between the  
228 restoration period and prior to abandonment, indicating that this type of combined management was an  
229 effective restoration technique.

230 The analyses also revealed significant differences in flowering plant composition between the  
231 abandonment and management periods at transect level ( $F = 11.5$ ;  $P = 0.009$ ). The species most visited by  
232 butterflies in the abandonment period were *Cirsium* spp., *Rubus* spp. and *Mentha suaveolens*, which  
233 dominated the whole of the butterfly-plant interactions recorded during that period (see appendix A; Fig.  
234 5). Once management was restored, however, the number of visits to these plants fell dramatically (except  
235 for *Rubus* spp., which maintained a large number of visits throughout the whole study period), while the

236 number of visits to *Lotus corniculatus* and several species of *Trifolium* increased, despite the severe fall in  
237 number of visits during the abandonment period.

238

#### 239 *Butterfly ecological traits related to management*

240 Voltinism was the only ecological trait that predicted butterfly population trends in the abandoned  
241 sections. This trait explained the observed population trends during both the abandonment and the  
242 management periods, albeit with opposing effects (Fig. 3). All monovoltine species experienced positive  
243 trends when the meadows were abandoned but negative trends once management was restored. Bivoltine  
244 and multivoltine species, on the other hand, showed fairly variable trends in both periods, although  
245 multivoltine species tended to benefit from grazing and mowing as indicated by mostly positive trends  
246 during the restoration period (Fig. 3).

247

#### 248 *Butterfly-plant interaction trends*

249

250 A total of 45 species of butterflies and 65 species of nectar plants were recorded and 17% of all  
251 possible interactions between these groups were detected. The species present in each annual network  
252 were highly variable and showed low persistence (i.e. number of years present) in many cases.  
253 Persistence was lower in plants ( $7.6 \pm 6.7$  years) than in butterflies ( $13 \pm 8.8$  years) (Wilcoxon rank test:  
254  $W = 2439.5$ ;  $P < 0.001$ ). The high turnover of species indicates great variability in the interactions  
255 occurring between butterflies and plants from year to year, which translates into a variable network  
256 structure over time. Despite the great annual fluctuation in network parameters, results were consistent  
257 with a temporal trend of linear decrease in network specialization ( $H_2$ ) ( $R^2$  adjusted = 0.34) (Fig. 4).  
258 However, when the only-grazed section (#1) was excluded, this trend fitted a polynomial function better  
259 (adjusted  $R^2 = 0.57$ ), which showed how network specialization increased during the abandonment period  
260 and diminished again after management was restored. Modularity significantly decreased over time across  
261 all sections, although this relationship was not significant if the only-grazed section was excluded. The  
262 mowing-grazing restoration showed an overall increase in nestedness, although its trend was only  
263 marginally significant.

264 **Discussion**

265

266 A vast amount of literature shows how rapidly butterfly populations respond to habitat changes of  
267 different kinds (e.g. Thomas, 1991; Dennis, 2010). Evidence for such responses has rapidly accumulated  
268 over past decades in many European countries thanks to the establishment of butterfly monitoring  
269 schemes and the recognition of butterflies as a good bioindicator group (Thomas, 2005). The present  
270 work illustrates not only how butterfly populations respond to changes in habitats but also that notable  
271 changes occur in the interactions established between plants and adult butterflies.

272

273 Impact of abandonment and restoration on butterflies and plant interactions

274 The decline in some butterfly species and their interactions with many plants was probably linked to  
275 the loss of nearly half of the grassland coverage after the meadows were abandoned. Restoration enabled  
276 these plant communities to recover significantly when mowing and grazing were combined (see appendix  
277 A: Fig. 3). Otherwise, pasturing alone proved to be insufficient in one of the meadows (#1), where  
278 grassland communities continued to decline until they completely disappeared by 2018. Therefore,  
279 mowing may be necessary for the conservation of typical Mediterranean meadows, which in this  
280 protected area have been identified as the most valuable habitat for butterflies (Stefanescu et al., 2005).

281 Butterfly community analysis over time confirms that changes in habitat lead to rapid modifications in  
282 butterfly assemblages. Thus, once the meadows were abandoned, butterfly communities underwent  
283 dramatic rearrangements, with a few monovoltine grass-feeder species experiencing population  
284 explosions (e.g. *Melanagia lachesis*, *Pyronia cecilia* and *Pyronia tithonus*, see appendix A: Fig. 6). By  
285 contrast, the populations of some multivoltine legume-feeders collapsed (e.g. *Plebejus argus* and  
286 *Polyommatus icarus*). Interestingly, changes in the populations of these species were also noticed in the  
287 control section (#6) that was managed throughout the whole study period, although these trends were in  
288 the opposite direction. As the meadows were abandoned, both butterfly abundances and visits to  
289 flowering plants substantially increased in the control section. Because the habitat remained essentially  
290 the same in the control section during this period, population increases of multivoltine species were  
291 probably related to the forced dispersal of populations from the nearby abandoned meadows. This is  
292 exemplified by *Plebejus argus*, whose numbers increased dramatically in the control section (up to an  
293 extraordinary density of five individuals/m in 2005) coinciding with the collapse of its populations in the

294 abandoned sections. Therefore, population fluctuations are not only related to changes in the habitat  
295 where they are recorded but are also likely to be affected by a wider range of habitats where they are  
296 connected to other subpopulations (Keymer et al., 2000; Johst et al., 2002) in a metapopulation structure  
297 (Thomas & Harrison, 1992; Hanski & Thomas, 1994; Leweis et al., 1997). The temporal trends show how  
298 a meadow representing a sink habitat for *P. argus* at the beginning of the study became the only  
299 stronghold for its vanishing populations among the abandoned and deteriorating meadows. Moreover,  
300 once the habitat in the meadows improved following the restoration of management, the single meadow  
301 harbouring a population (i.e. the former sink) of this butterfly became a source (Pulliam, 1988) from  
302 which new habitats were re-colonized. This pattern highlights the importance of conserving networks of  
303 well-connected patches for habitat specialists, as has been highlighted by many theoretical and empirical  
304 studies (e.g. Hanski, 1999). This highly dynamic system allowed for a rapid recovery of collapsing  
305 populations when mowing and grazing restarted in the abandoned meadows harbouring the original  
306 populations.

307 The complexity of the management techniques required to reach ideal conditions for plant and  
308 butterfly communities is a recurrent theme in butterfly conservation (Settele et al., 2009). In this context,  
309 the control meadow where management continued throughout the study period showed some of the worst  
310 trends. This is likely due to the great disturbance (i.e. large number of grazing and mowing episodes),  
311 which ultimately affected butterfly populations and interactions with plants. The ruderalization of plant  
312 communities was linked to a reduction in the number and diversity of flower resources, which led to  
313 lower abundances in butterfly and probably other pollinator communities (Scheper et al., 2014). The  
314 absence of negative trends in butterfly richness and diversity suggests that the loss of available nectar  
315 resources led to a reduction in butterfly abundance and not *vice versa*.

316

### 317 Butterfly life-history traits predict species' responses to environmental succession

318 Certain previous studies have attempted to explain trends in butterfly populations in abandoned  
319 grasslands by examining species traits (Steffan-Dewenter & Tschamtker, 1997; Sanford, 2002; Stefanescu  
320 et al., 2009). Kithara et al. (2000) reported that species richness declined more in specialists than in  
321 generalists along a gradient of increasing disturbance when specialization was measured in terms of  
322 voltinism and host-plant specialization. Likewise, Pöyry et al. (2006) observed that the abandonment of  
323 grasslands benefitted generalist herbivores, while low-intensity management was more beneficial to

324 specialists. In our study system, Stefanescu et al. (2009) failed to observe differences in host-plant  
325 specialization but did detect an increase in seasonal specialization (i.e. decrease in voltinism) of the  
326 communities in accordance to the r/k species concept (Pianka, 1970). In a habitat with recurrent  
327 disturbance (i.e. mowing and/or grazing) the species that will dominate the community will be those with  
328 high reproductive rates (Brown & Southwood, 1983; Brown, 1985). By contrast, species with longer  
329 developmental times and, therefore, with fewer annual generations will benefit from the abandonment of  
330 management practices (i.e. absence of disturbance). Our results, added to the previous study by  
331 Stefanescu et al. (2009) using data from another 14 years of management restoration, confirm that  
332 voltinism is indeed the best life-history trait for predicting population trends affected by managing  
333 practices in Mediterranean meadows.

334

### 335 How does network structure change as a result of meadow management?

336 Our work also revealed interesting changes in the butterfly-plant network structure as a consequence  
337 of habitat management. The non-linearity of long-term trends in network parameters makes sense if we  
338 consider that management practices changed twice during the study period (Fig. 4). The increase in  
339 network specialization ( $H_2'$ ) when there was a lack of management suggests greater feeding selectivity by  
340 butterflies in this period. Butterflies are commonly regarded as generalist nectar-feeders, the level of  
341 specialization of species being more related to the length of the flight period than to their evolutionary  
342 history (Stefanescu & Traveset, 2009; Olesen et al., 2011). Monovoltine species will only be able to  
343 interact with those plants that are in bloom during their short flight period, whereas species with multiple  
344 generations can potentially interact with a greater number of plants. Therefore, the turnover of species  
345 that occurred during meadow abandonment (i.e. the substitution of multivoltine by monovoltine species)  
346 could explain the increasing specialization of the network. In other words, the greater specialization of the  
347 network was probably not due to a change in species' behaviour but to population changes and species  
348 turnover. Moreover, although neither the total number of visits nor the diversity of the plants visited  
349 significantly changed in this period (Table 1), the number of butterfly visits some opportunistic plants  
350 (e.g. *Cirsium* spp., *Rubus* spp. and *Mentha suaveolens*) received increased markedly (see appendix A: Fig.  
351 5). The dominance of these species could have reduced the likelihood that butterflies would interact with  
352 other species. Previous studies have reported a relative constancy in the nestedness pattern in plant-  
353 pollinator networks subject to notable annual fluctuations in the identity of the species in the network

354 (Alarcón et al., 2008; Petanidou et al., 2008). Nevertheless, we found a slight tendency for nestedness to  
355 increase in the meadows that were restored ( $P = 0.091$ ,  $R^2 = 0.21$ ). This pattern could amplified given the  
356 increasing complexity of the network (i.e. number of interactions) as more abundant butterfly populations  
357 will predictably visit more nectar plant species (Bascompte et al., 2003). Both an increase in generality  
358 (i.e. reducing network specialization) and network nestedness could enhance the stability and functional  
359 redundancy of communities (Okuyama & Holland, 2008; Kaiser-Bunbury et al., 2017). This could be  
360 especially important in a context of global change, where episodes of extreme aridity are likely to threaten  
361 Mediterranean butterfly populations (Herrando et al., 2019). Therefore, the restoration of traditional  
362 management in meadows could increase ecosystem resilience in the face of future climate disturbance  
363 (Walker, 1995). In this context, we consider that restoration efforts in semi-natural habitats should be  
364 focused not only on species but also on their interactions (Tylianakis et al., 2010; Valiente Banuet et al.,  
365 2015; Kaiser-Bunbury and Blütghen, 2015).

366

## 367 **Conclusions**

368

369 The abandonment of Mediterranean meadows led to significant reductions in the cover of typical  
370 grassland plants and, in turn, caused rapid changes to occur in butterfly assemblages. Such changes were  
371 recorded not only in meadows undergoing vegetation encroachment but also in nearby unaltered habitats  
372 due to the metapopulation structure of some butterfly species. A highly dynamic source-sink system was  
373 then established between managed and unmanaged habitat patches, ultimately allowing for  
374 metapopulation persistence. In addition, our data show that management restoration combining mowing  
375 and grazing can promote a quick return in the butterfly community to the pre-abandonment situation.  
376 However, insufficient management pressure (only-grazed section 1) or, conversely, excessive grazing and  
377 mowing pressure (control section 6) did not permit a proper recovery and led, instead, to a progressive  
378 decline in diversity. Interesting temporal trends in the butterfly-plant network structure paralleling habitat  
379 changes were also detected. Both interaction generalisation and nestedness decreased when meadows  
380 were abandoned but increased again once habitat was restored by combining mowing and grazing. These  
381 results suggest that effective meadow management not only helps maintain a richer butterfly community  
382 but also increases functional redundancy and network stability. Our work highlights the importance of

383 maintaining traditional management practices in these semi-natural meadows as an effective way of  
384 preserving their highly diverse communities and the stability of the whole butterfly-plant network.  
385

386 **Acknowledgements**

387

388 We wish to thank the staff of the Aiguamolls de l'Empordà Natural Park for their support during these  
389 years. Thanks too are due to Ferran Páramo and Andreu Ubach for their technical support, Amparo  
390 Lázaro for her assistance in some of the statistical analyses and Pedro Bergamo for his useful comments  
391 and suggestions in an advanced version of the manuscript. The Butterfly Monitoring Scheme in Catalonia  
392 is funded by the Departament de Territori i Sostenibilitat de la Generalitat de Catalunya. PC was funded  
393 by a PhD fellowship from the Govern de les Illes Balears (FPI-CAIB-2018). This work is part of project  
394 GLC2017-88122-P financed by the Spanish Ministry of Science and Innovation to AT.



395 **Tables**

396

397 **Table 1.** Temporal trends in all the ecological descriptors in the analysed periods. Beta coefficients and *P*  
398 values are given. *P* values for the Generalised Linear Model comparisons between the trends in the  
399 different treatments (abandoned vs. managed and grazing vs. grazing + mowing) are shown in the GLM \*  
400 rows.

|                                                                        | Study period<br>(1997–2018) |                                 | Abandonment<br>(1998–2004)      |                                | Restoration<br>(2004–2018)      |                                 |
|------------------------------------------------------------------------|-----------------------------|---------------------------------|---------------------------------|--------------------------------|---------------------------------|---------------------------------|
|                                                                        |                             |                                 | Abandoned                       | Managed                        | Grazing                         | Graz. + mown                    |
| <b>Butterfly abundance</b><br>(Number of individuals/100m)             | S1                          | $\beta = -7.759$<br>$P < 0.001$ | $\beta = -5.85$<br>$P = 0.528$  |                                | $\beta = -4.013$<br>$P = 0.229$ |                                 |
|                                                                        | S2                          | $\beta = -0.322$<br>$P = 0.906$ | $\beta = 29.73$<br>$P = 0.087$  |                                |                                 | $\beta = -3.944$<br>$P = 0.382$ |
|                                                                        | S3                          | $\beta = -0.689$<br>$P = 0.753$ | $\beta = 29.42$<br>$P = 0.051$  |                                |                                 | $\beta = -2.424$<br>$P = 0.459$ |
|                                                                        | S4                          | $\beta = -4.686$<br>$P = 0.037$ | $\beta = 21.63$<br>$P = 0.125$  |                                |                                 | $\beta = -0.209$<br>$P = 0.923$ |
|                                                                        | S5                          | $\beta = 1.272$<br>$P = 0.643$  | $\beta = -6.67$<br>$P = 0.415$  |                                |                                 | $\beta = 3.434$<br>$P = 0.552$  |
|                                                                        | S6                          | $\beta = -3.272$<br>$P = 0.302$ |                                 | $\beta = 33.65$<br>$P = 0.004$ |                                 | $\beta = -13.88$<br>$P = 0.019$ |
|                                                                        | GLM*                        |                                 | $F = 3.982; P = 0.074$          |                                | $F = 1.18; P = 0.287$           |                                 |
| <b>Butterfly richness</b><br>(Number of butterfly species)             | S1                          | $\beta = -0.579$<br>$P < 0.001$ | $\beta = -0.571$<br>$P = 0.263$ |                                | $\beta = -0.489$<br>$P = 0.022$ |                                 |
|                                                                        | S2                          | $\beta = 0.183$<br>$P = 0.092$  | $\beta = 0.285$<br>$P = 0.715$  |                                |                                 | $\beta = 0.111$<br>$P = 0.539$  |
|                                                                        | S3                          | $\beta = 0.046$<br>$P = 0.711$  | $\beta = 1.643$<br>$P = 0.074$  |                                |                                 | $\beta = -0.075$<br>$P = 0.72$  |
|                                                                        | S4                          | $\beta = -0.327$<br>$P = 0.008$ | $\beta = -0.286$<br>$P = 0.740$ |                                |                                 | $\beta = 0.096$<br>$P = 0.518$  |
|                                                                        | S5                          | $\beta = -0.208$<br>$P = 0.047$ | $\beta = 0.285$<br>$P = 0.363$  |                                |                                 | $\beta = 0.079$<br>$P = 0.669$  |
|                                                                        | S6                          | $\beta = -0.254$<br>$P = 0.031$ |                                 | $\beta = 0.893$<br>$P = 0.153$ |                                 | $\beta = -0.371$<br>$P = 0.055$ |
|                                                                        | GLM*                        |                                 | $F = 0.844; P = 0.38$           |                                | $F = 6.446; P = 0.017$          |                                 |
| <b>Butterfly diversity</b><br>(Shannon diversity index of butterflies) | S1                          | $\beta = -0.043$<br>$P < 0.001$ | $\beta = -0.077$<br>$P = 0.004$ |                                | $\beta = -0.048$<br>$P = 0.003$ |                                 |
|                                                                        | S2                          | $\beta = 0.018$<br>$P = 0.005$  | $\beta = -0.047$<br>$P = 0.132$ |                                |                                 | $\beta = 0.031$<br>$P = 0.021$  |
|                                                                        | S3                          | $\beta = 0.019$<br>$P = 0.008$  | $\beta = 0.069$<br>$P = 0.126$  |                                |                                 | $\beta = 0.012$<br>$P = 0.303$  |
|                                                                        | S4                          | $\beta = -0.021$                | $\beta = -0.047$                |                                |                                 | $\beta = 0.013$                 |

|                                                                           |      |                                                        |                                                       |                                                       |                                                        |                                                        |
|---------------------------------------------------------------------------|------|--------------------------------------------------------|-------------------------------------------------------|-------------------------------------------------------|--------------------------------------------------------|--------------------------------------------------------|
|                                                                           |      | <b>P = 0.032</b>                                       | $P = 0.294$                                           |                                                       |                                                        | $P = 0.391$                                            |
|                                                                           | S5   | <b><math>\beta = -0.034</math></b><br><b>P = 0.028</b> | $\beta = 0.047$<br>$P = 0.465$                        |                                                       |                                                        | $\beta = -0.019$<br>$P = 0.459$                        |
|                                                                           | S6   | <b><math>\beta = -0.031</math></b><br><b>P = 0.002</b> |                                                       | $\beta = -0.009$<br>$P = 0.616$                       |                                                        | $\beta = -0.022$<br>$P = 0.244$                        |
|                                                                           | GLM* |                                                        | $F = 0.002; P = 0.963$                                |                                                       | <b><math>F = 12.54; P = 0.003</math></b>               |                                                        |
| <b>Flower visits</b><br>(Total number of plants visited by butterflies)   | S1   | <b>-7.47</b><br><b>P &lt; 0.001</b>                    | $\beta = -3.25$<br>$P = 0.344$                        |                                                       | <b><math>\beta = -4.854</math></b><br><b>P = 0.014</b> |                                                        |
|                                                                           | S2   | $\beta = -0.016$<br>$P = 0.992$                        | $\beta = 20.21$<br>$P = 0.109$                        |                                                       |                                                        | $\beta = 0.221$<br>$P = 0.924$                         |
|                                                                           | S3   | $\beta = 0.638$<br>$P = 0.416$                         | $\beta = 8.786$<br>$P = 0.123$                        |                                                       |                                                        | $\beta = 1.989$<br>$P = 0.076$                         |
|                                                                           | S4   | $\beta = 0.189$<br>$P = 0.424$                         | <b><math>\beta = 1.857</math></b><br><b>P = 0.035</b> |                                                       |                                                        | <b><math>\beta = 0.901</math></b><br><b>P = 0.044</b>  |
|                                                                           | S5   | $\beta = 0.998$<br>$P = 0.433$                         | $\beta = 4.714$<br>$P = 0.356$                        |                                                       |                                                        | $\beta = 1.296$<br>$P = 0.62$                          |
|                                                                           | S6   | $\beta = -0.937$<br>$P = 0.278$                        |                                                       | <b><math>\beta = 10.39</math></b><br><b>P = 0.006</b> |                                                        | <b><math>\beta = -3.914</math></b><br><b>P = 0.015</b> |
|                                                                           | GLM* |                                                        | $F = 1.094; P = 0.32$                                 |                                                       | <b><math>F = 7.727; P = 0.01</math></b>                |                                                        |
| <b>Plant richness</b><br>(Number of plant species visited by butterflies) | S1   | <b><math>\beta = -0.028</math></b><br><b>P = 0.011</b> | $\beta = -0.714$<br>$P = 0.13$                        |                                                       | $\beta = -0.278$<br>$P = 0.16$                         |                                                        |
|                                                                           | S2   | <b><math>\beta = 0.199</math></b><br><b>P = 0.017</b>  | $\beta = 0.286$<br>$P = 0.535$                        |                                                       |                                                        | $\beta = 0.203$<br>$P = 0.194$                         |
|                                                                           | S3   | $\beta = 0.117$<br>$P = 0.274$                         | $\beta = 0.643$<br>$P = 0.153$                        |                                                       |                                                        | $\beta = -0.157$<br>$P = 0.449$                        |
|                                                                           | S4   | $\beta = -0.053$<br>$P = 0.424$                        | $\beta = 0.25$<br>$P = 0.392$                         |                                                       |                                                        | $\beta = 0.05$<br>$P = 0.701$                          |
|                                                                           | S5   | $\beta = 0.111$<br>$P = 0.07$                          | $\beta = -0.25$<br>$P = 0.548$                        |                                                       |                                                        | <b><math>\beta = 0.304</math></b><br><b>P = 0.001</b>  |
|                                                                           | S6   | $\beta = -0.076$<br>$P = 0.401$                        |                                                       | <b><math>\beta = 1.143</math></b><br><b>P = 0.032</b> |                                                        | <b><math>\beta = -0.425</math></b><br><b>P = 0.008</b> |
|                                                                           | GLM* |                                                        | <b><math>F = 5.109; P = 0.047</math></b>              |                                                       | $F = 3.203; P = 0.085$                                 |                                                        |

401

402 **Figures**

403

404 **Figure 1.** Trends in dissimilarity values with respect to the first year of monitoring (1997) for the  
405 butterfly communities. In green: section 1; in blue: sections 2–5 (with standard deviation represented by  
406 bars); in red: section 6.

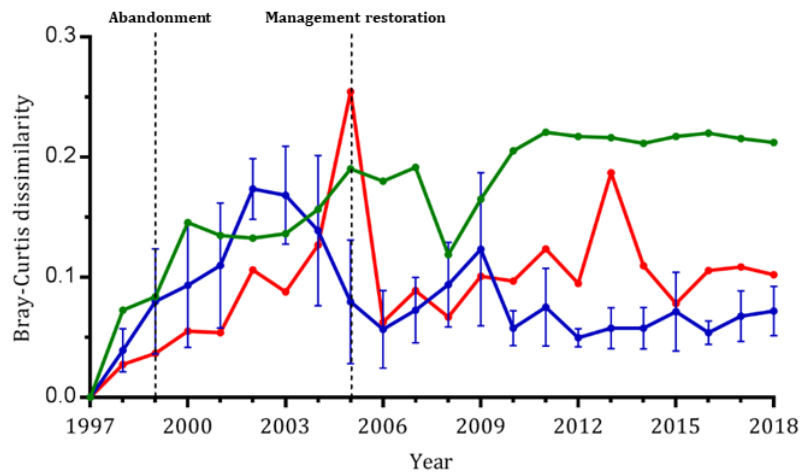

407

408 **Figure 2.** Non-Metric Multidimensional Scaling (NMDS) plots for each section of the transect. The  
409 different periods of analysis are represented in colours: green: before abandonment; blue: abandonment  
410 period; red: after management was restored. Dotted lines and asterisks represent significant differences ( $P$   
411  $< 0.05$  in PERMANOVA analysis) between periods. \* 1999 was included in the period before  
412 abandonment as butterfly communities were still very similar to the initial situation due to the inertia in  
413 changes in plant composition in the first year after abandonment.

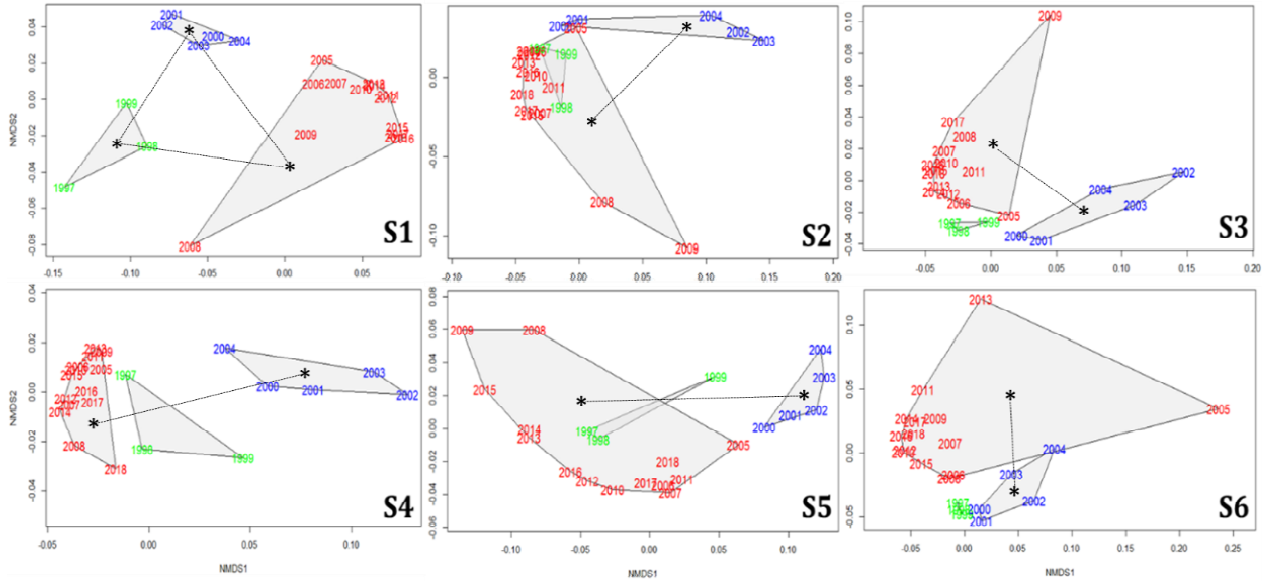

414  
415

416 **Figure 3.** Population trends in the butterfly species in the abandoned sections (1–5) in relation to  
417 voltinism (number of generations per year). Population trends in the different species are represented as  
418 the slope values of the linear regression models.

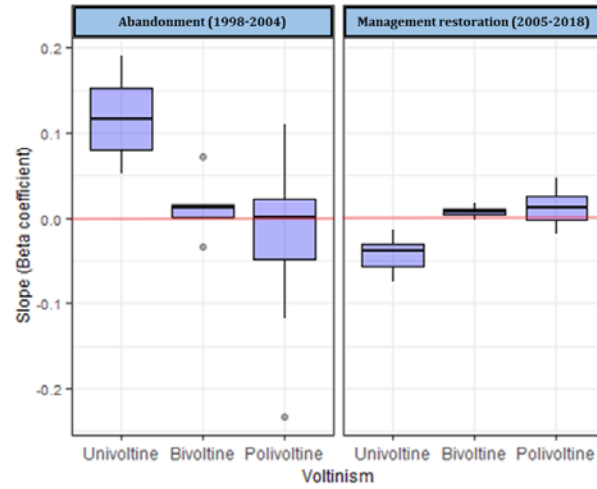

419

420 **Figure 4.** Network structure dynamics in the abandoned meadows. Network indices trends for  
421 (a) all abandoned meadows – i.e. sections 1–5 of the transect - and (b) abandoned sections that  
422 were restored by mowing and grazing – i.e. sections 2–5 of the transect. P-values and adjusted  
423 R-squared of the GAM models are shown.

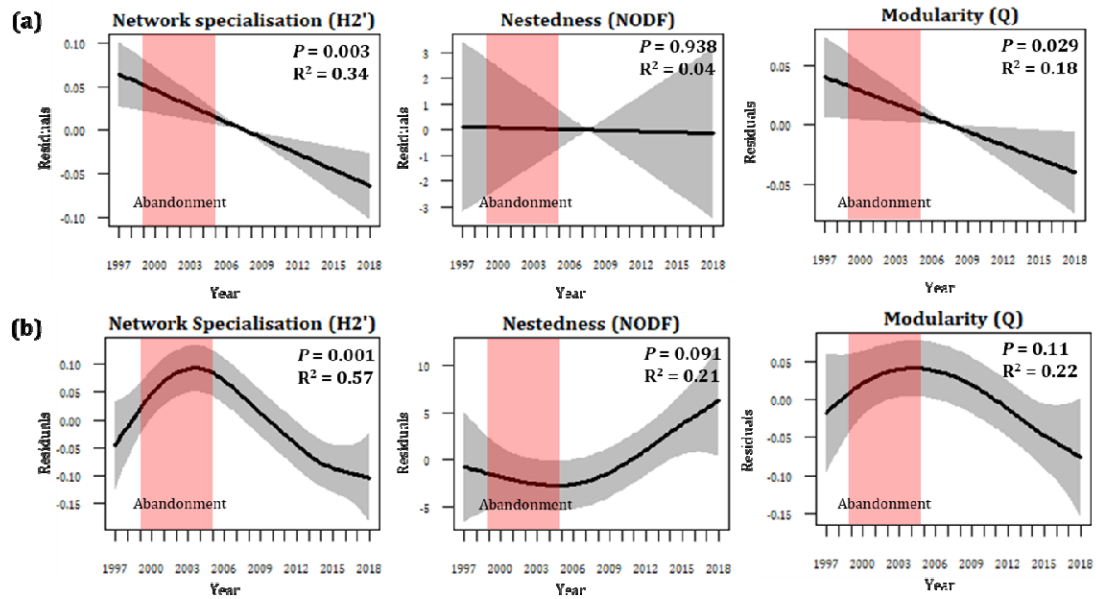

424  
425

426 **References**

427

428 Alarcón, R., Waser, N. M., & Ollerton, J. (2008). Year-to-year variation in the topology of a plant–  
429 pollinator interaction network. *Oikos*, *117*(12), 1796–1807. <https://doi.org/10.1111/j.0030-1299.2008.16987.x>

431 Bakker, J. P., & Berendse, F. (1999). Constraints in the restoration of ecological diversity in grassland  
432 and heathland communities. *Trends in ecology & evolution*, *14*(2), 63–68. [https://doi.org/10.1016/S0169-5347\(98\)01544-4](https://doi.org/10.1016/S0169-5347(98)01544-4)

434 Balmer, O., & Erhardt, A. (2000). Consequences of succession on extensively grazed grasslands for  
435 central European butterfly communities: rethinking conservation practices. *Conservation biology*, *14*(3),  
436 746–757. <https://doi.org/10.1046/j.1523-1739.2000.98612.x>

437 Bascompte, J., Jordano, P., Melián, C. J., & Olesen, J. M. a.(2003). The nested assembly of plant–  
438 animal mutualistic networks. *Proceedings of the National Academy of Sciences*, *100*(16), 9383–9387.  
439 <https://doi.org/10.1073/pnas.1633576100>

440 Blondel, J., J. Aronson, J. Y. Bodiou, & Boeuf, G. (2010). The Mediterranean region: biological  
441 diversity in space and time. *Oxford University Press*.

442 Briggs, J. M., A. K. Knapp, J. M. Blair, J.L. Heisler, G. A. Hoch, M. S. Lett & McCarron, J.K. (2005).  
443 An ecosystem in transition: causes and consequences of the conversion of mesic grassland to  
444 shrubland. *BioScience*, *55*(3), 243–254. [https://doi.org/10.1641/0006-3568\(2005\)055\[0243:AEITCA\]2.0.CO;2](https://doi.org/10.1641/0006-3568(2005)055[0243:AEITCA]2.0.CO;2)

446 Brown, V. K. (1985). Insect herbivores and plant succession. *Oikos*, 17–22.  
447 <https://www.jstor.org/stable/3544037>

448 Brown, V. K., & Southwood, T.R.E. (1983). Trophic diversity, niche breadth and generation times of  
449 exopterygote insects in a secondary succession. *Oecologia*, *56*(2–3), 220–225.  
450 <https://doi.org/10.1007/BF00379693>

451 Carvell, C. (2002). Habitat use and conservation of bumblebees (*Bombus* spp.) under different  
452 grassland management regimes. *Biological conservation*, *103*(1), 33–49. [https://doi.org/10.1016/S0006-3207\(01\)00114-8](https://doi.org/10.1016/S0006-3207(01)00114-8)

454 Clarke, K.R. (1993). Non-parametric multivariate analyses of changes in community  
455 structure. *Australian Journal of Ecology*, *18*, 117–143. <https://doi.org/10.1111/j.1442-9993.1993.tb00438.x>

457 Cramer, V. A., R.J. Hobbs, & Standish, R.J. (2008). What's new about old fields? Land abandonment  
458 and ecosystem assembly. *Trends in ecology & evolution*, *23*(2), 104–112.  
459 <https://doi.org/10.1016/j.tree.2007.10.005>

460 Dennis, R.L.H. (2010). A resource-based habitat view for conservation. *Butterflies in the British*  
461 *landscape*. Wiley-Blackwell. 406 pp.

462 Di Giulio, M., P. J. Edwards, & Meister, E. (2001). Enhancing insect diversity in agricultural  
463 grasslands: the roles of management and landscape structure. *Journal of applied Ecology*, *38*(2), 310–319.  
464 <https://doi.org/10.1046/j.1365-2664.2001.00605.x>

465 Donald, P. F., R.E. Green, & Heath, M.F. (2001). Agricultural intensification and the collapse of  
466 Europe's farmland bird populations. *Proceedings of the Royal Society of London. Series B: Biological*  
467 *Sciences*, *268*(1462), 25–29. <https://doi.org/10.1098/rspb.2000.1325>

468 Dormann, C. F., Fründ, J., Blüthgen, N., & Gruber, B. (2009). Indices, graphs and null models:  
469 analyzing bipartite ecological networks. *The Open Ecology Journal*, *2*(1). DOI:  
470 10.2174/1874213000902010007

471 Dover, J. W., S. Spencer, S. Collins, I. Hadjigeorgiou, & A. Rescia, (2011). Grassland butterflies and  
472 low intensity farming in Europe. *Journal of Insect Conservation*, *15*(1–2), 129–137.  
473 <https://doi.org/10.1007/s10841-010-9332-0>



- 474 Erhardt, A. (1985). Diurnal Lepidoptera: sensitive indicators of cultivated and abandoned  
475 grassland. *Journal of Applied Ecology*, 849-861. <https://www.jstor.org/stable/2403234>
- 476 Feranec, J., G. Jaffrain, T. Soukup, & Hazeu, G. (2010). Determining changes and flows in European  
477 landscapes 1990–2000 using CORINE land cover data. *Applied geography*, 30(1), 19-35.  
478 <https://doi.org/10.1016/j.apgeog.2009.07.003>
- 479 García-Barros, E., M.L. Munguira, C. Stefanescu, & Vives-Moreno, A. (2013). Lepidoptera:  
480 Papilionoidea. *Fauna Ibérica*, 37. Museo Nacional de Ciencias Naturales-CSIC, Madrid. 1213 pp.
- 481 Gesti, J.G. Mercadal & Vilar, L. (2003). La Biodiversidad de los Prados de Siega de los Aiguamolls  
482 de L 'Alt Empordà (Girona). XIX Jornadas de Fitosociología – Congreso de la Federación Internacional  
483 de Fitosociología, Biodiversidad y Gestión del Territorio. La Laguna, Tenerife.
- 484 Hanski, I. & Thomas, C.D. (1994). Metapopulation dynamics and conservation: a spatially explicit  
485 model applied to butterflies. *Biological Conservation*, 68(2), 167-180. [https://doi.org/10.1016/0006-3207\(94\)90348-4](https://doi.org/10.1016/0006-3207(94)90348-4)
- 487 Hanski, I. (1999). Habitat connectivity, habitat continuity, and metapopulations in dynamic  
488 landscapes. *Oikos*, 209-219. <https://www.jstor.org/stable/3546736>
- 489 Herrando, S., L. Brotons, M. Anton, F. Paramo, D. Villero., N. Titeux, J. Quesada & Stefanescu, C.  
490 (2016). Assessing impacts of land abandonment on Mediterranean biodiversity using indicators based on  
491 bird and butterfly monitoring data. *Environmental Conservation*, 43(1), 69-78.  
492 <https://doi.org/10.1017/S0376892915000260>
- 493 Herrando, S., Titeux, N., Brotons, L., Anton, M., Ubach, A., Villero, D., García-Barros, E., Munguira,  
494 M., Godinho, C. & Stefanescu, C. (2019). Contrasting impacts of precipitation on Mediterranean birds  
495 and butterflies. *Scientific reports*, 9(1), 1-7. <https://doi.org/10.5061/dryad.ch8dd57>.
- 496 Johst, K., R. Brandl, & Eber, S. (2002). Metapopulation persistence in dynamic landscapes: the role of  
497 dispersal distance. *Oikos*, 98(2), 263-270. <https://doi.org/10.1034/j.1600-0706.2002.980208.x>
- 498 Kaiser-Bunbury, C. N., & Blüthgen, N. (2015). Integrating network ecology with applied  
499 conservation: a synthesis and guide to implementation. *AoB Plants*, 7.  
500 <https://doi.org/10.1093/aobpla/plv076>
- 501 Kaiser-Bunbury, C. N., Mougai, J., Whittington, A. E., Valentin, T., Gabriel, R., Olesen, J. M., &  
502 Blüthgen, N. (2017). Ecosystem restoration strengthens pollination network resilience and  
503 function. *Nature*, 542(7640), 223-227. <https://doi.org/10.1038/nature21071>
- 504 Kehoe, L., A. Romero-Muñoz, E. Polaina, L., Estes, H. Kreft, & Kuemmerle, T. (2017). Biodiversity  
505 at risk under future cropland expansion and intensification. *Nature ecology & evolution*, 1(8), 1129-1135.  
506 <https://doi.org/10.1038/s41559-017-0234-3>
- 507 Keymer, J. E., P.A. Marquet, J.X. Velasco-Hernández, Levin, S.A. (2000). Extinction thresholds and  
508 metapopulation persistence in dynamic landscapes. *The American Naturalist*, 156(5), 478-494.  
509 <https://doi.org/10.1086/303407>
- 510 Kitahara, M., K. Sei & Fujii, K. (2000). Patterns in the structure of grassland butterfly communities  
511 along a gradient of human disturbance: further analysis based on the generalist/specialist  
512 concept. *Population Ecology*, 42(2), 135-144. <https://doi.org/10.1007/PL00011992>
- 513 Kleijn, D., F. Kohler, A. Báldi, P. Batáry, E.D. Concepción, Y. Clough, M. Diaz, D. Gabriel, A.  
514 Holzschuh, E Knop, & A. Kovács, E.J.P. Marshall, T. Tschamtké & Verhulst, J. (2009). On the  
515 relationship between farmland biodiversity and land-use intensity in Europe. *Proceedings of the royal  
516 society B: biological sciences*, 276(1658), 903-909. <https://doi.org/10.1098/rspb.2008.1509>
- 517 Kleijn, D., M. Rundlöf, J. Scheper, H.G. Smith, & Tschamtké, T. (2011). Does conservation on  
518 farmland contribute to halting the biodiversity decline?. *Trends in ecology & evolution*, 26(9), 474-481.  
519 <https://doi.org/10.1016/j.tree.2011.05.009>
- 520 Klein, A. M., Vaissiere, B. E., Cane, J. H., Steffan-Dewenter, I., Cunningham, S. A., Kremen, C., &  
521 Tschamtké, T. (2007). Importance of pollinators in changing landscapes for world crops. *Proceedings of  
522 the royal society B: biological sciences*, 274(1608), 303-313. <https://doi.org/10.1098/rspb.2006.3721>

- 523 Kremen, C. (2005). Managing ecosystem services: what do we need to know about their ecology?.  
524 *Ecology letters*, 8(5), 468-479. <https://doi.org/10.1111/j.1461-0248.2005.00751.x>
- 525 Kruess, A., & Tschamtko, T. (2002). Contrasting responses of plant and insect diversity to variation in  
526 grazing intensity. *Biological conservation*, 106(3), 293-302. [https://doi.org/10.1016/S0006-](https://doi.org/10.1016/S0006-3207(01)00255-5)  
527 3207(01)00255-5
- 528 Lewis, O., C. Thomas, J. Hill, M. Brookes, T. P. Crane, Y. Graneau, J. Mallet, Rose, O. (1997). Three  
529 ways of assessing metapopulation structure in the butterfly *Plebejus argus*. *Ecological Entomology*, 22(3),  
530 283-293. <https://doi.org/10.1046/j.1365-2311.1997.00074.x>
- 531 Marini, L., P. Fontana, A. Battisti, & Gaston, K.J. (2009). Response of orthopteran diversity to  
532 abandonment of semi-natural meadows. *Agriculture, ecosystems & environment*, 132(3-4), 232-236.  
533 <https://doi.org/10.1016/j.agee.2009.04.003>
- 534 Meiners, S. J., S. T. Pickett, & Cadenasso, M. L. (2001). Effects of plant invasions on the species  
535 richness of abandoned agricultural land. *Ecography*, 24(6), 633-644. [https://doi.org/10.1111/j.1600-](https://doi.org/10.1111/j.1600-0587.2001.tb00525.x)  
536 0587.2001.tb00525.x
- 537 Öckinger, E., A.K. Eriksson, & Smith, H.G. (2006). Effects of grassland abandonment, restoration  
538 and management on butterflies and vascular plants. *Biological conservation*, 133(3), 291-300.  
539 <https://doi.org/10.1016/j.biocon.2006.06.009>
- 540 Okuyama, T., & Holland, J. N. (2008). Network structural properties mediate the stability of  
541 mutualistic communities. *Ecology Letters*, 11(3), 208-216. [https://doi.org/10.1111/j.1461-](https://doi.org/10.1111/j.1461-0248.2007.01137.x)  
542 0248.2007.01137.x
- 543 Olesen, J. M., Bascompte, J., Elberling, H., & Jordano, P. (2008). Temporal dynamics in a pollination  
544 network. *Ecology*, 89(6), 1573-1582. <https://doi.org/10.1890/07-0451.1>
- 545 Olesen, J. M., Stefanescu, C., & Traveset, A. (2011). Strong, long-term temporal dynamics of an  
546 ecological network. *PLoS One*, 6(11). doi: 10.1371/journal.pone.0026455
- 547 Petanidou, T., Kallimanis, A. S., Tzanopoulos, J., Sgardelis, S. P., & Pantis, J. D. (2008). Long-term  
548 observation of a pollination network: fluctuation in species and interactions, relative invariance of  
549 network structure and implications for estimates of specialization. *Ecology letters*, 11(6), 564-575.  
550 <https://doi.org/10.1111/j.1461-0248.2008.01170.x>
- 551 Pianka, E. R. (1970). On r- and K-selection. *The American naturalist*, 104(940), 592-597.  
552 <https://doi.org/10.1086/282697>
- 553 Pollard, E. & Yates, T. (1993). *Monitoring Butterflies for Ecology and Conservation*. Chapman and  
554 Hall, London, UK.
- 555 Potts, S. G., Biesmeijer, J. C., Kremen, C., Neumann, P., Schweiger, O., & Kunin, W. E. (2010).  
556 Global pollinator declines: trends, impacts and drivers. *Trends in ecology & evolution*, 25(6), 345-353.  
557 <https://doi.org/10.1016/j.tree.2010.01.007>
- 558 Poschlod, P., & WallisDeVries, M.F. (2002). The historical and socioeconomic perspective of  
559 calcareous grasslands—lessons from the distant and recent past. *Biological Conservation*, 104(3), 361-  
560 376. [https://doi.org/10.1016/S0006-3207\(01\)00201-4](https://doi.org/10.1016/S0006-3207(01)00201-4)
- 561 Pöyry, J., S. Lindgren, J. Salminen & Kuussaari, M. (2005). Responses of butterfly and moth species  
562 to restored cattle grazing in semi-natural grasslands. *Biological Conservation*, 122(3), 465-478.  
563 <https://doi.org/10.1016/j.biocon.2004.09.007>
- 564 Pöyry, J., M. Luoto, J. Paukkunen, J. Pykälä, K. Raatikainen & Kuussaari, M. (2006). Different  
565 responses of plants and herbivore insects to a gradient of vegetation height: an indicator of the vertebrate  
566 grazing intensity and successional age. *Oikos*, 115(3), 401-412. [https://doi.org/10.1111/j.2006.0030-](https://doi.org/10.1111/j.2006.0030-1299.15126.x)  
567 1299.15126.x
- 568 Pruchniewicz, D., (2017). Abandonment of traditionally managed mesic mountain meadows affects  
569 plant species composition and diversity. *Basic and Applied Ecology*, 20, 10-18.  
570 <https://doi.org/10.1016/j.baae.2017.01.006>
- 571 Pulliam, H. R., (1988). Sources, sinks, and population regulation. *The American Naturalist*, 132(5),

- 572 652-661. <https://doi.org/10.1086/284880>
- 573 Pykälä, J., (2003). Effects of restoration with cattle grazing on plant species composition and richness  
574 of semi-natural grasslands. *Biodiversity & Conservation*, 12(11), 2211-2226.  
575 <https://doi.org/10.1023/A:1024558617080>
- 576 Pykälä, J., M. Luoto, R. K. Heikkinen, & Kontula, T. (2005). Plant species richness and persistence of  
577 rare plants in abandoned semi-natural grasslands in northern Europe. *Basic and applied ecology*, 6(1), 25-  
578 33. <https://doi.org/10.1016/j.baae.2004.10.002>
- 579 Rook, A. J., B. Dumont, J. Isselstein, K. Osoro, M.F. WallisDeVries, G. Parente, & Mills, J. (2004).  
580 Matching type of livestock to desired biodiversity outcomes in pastures—a review. *Biological*  
581 *conservation*, 119(2), 137-150. <https://doi.org/10.1016/j.biocon.2003.11.010>
- 582 Sanford, M. P. (2002). Effects of successional old fields on butterfly richness and abundance in  
583 agricultural landscapes. *Great Lakes Ent.*, 35, 193-207. <https://doi.org/10.1016/j.agee.2012.05.006>
- 584 Scheper, J., Reemer, M., van Kats, R., Ozinga, W. A., van der Linden, G. T., Schaminée, J. H., Siepel,  
585 H. & Kleijn, D. (2014). Museum specimens reveal loss of pollen host plants as key factor driving wild  
586 bee decline in The Netherlands. *Proceedings of the National Academy of Sciences*, 111(49), 17552-  
587 17557. <https://doi.org/10.1073/pnas.1412973111>
- 588 Settele, J., J. Dover, M. Dolek, & Konvicka, M. (2009). Butterflies of European ecosystems: impact of  
589 land use and options for conservation management. *Ecology of Butterflies in Europe*. Cambridge  
590 University Press, Cambridge, 353-370.
- 591 Slancarova, J., A. Bartonova, M. Zapletal, M. Kotilinek, Z.F. Fric, N. Micevski, V. Kati, & Konvicka,  
592 M. (2016). Life history traits reflect changes in Mediterranean butterfly communities due to forest  
593 encroachment. *PLoS one*, 11(3). <https://doi.org/10.1371/journal.pone.0152026>
- 594 Stefanescu, C., J. Peñuelas, & Filella, I. (2005). Butterflies highlight the conservation value of hay  
595 meadows highly threatened by land-use changes in a protected Mediterranean area. *Biological*  
596 *Conservation*, 126(2), 234-246. <https://doi.org/10.1016/j.biocon.2005.05.010>
- 597 Stefanescu, C., J. Penuelas, & Filella I. (2009). Rapid changes in butterfly communities following the  
598 abandonment of grasslands: a case study. *Insect Conservation and Diversity*, 2(4), 261-269.  
599 <https://doi.org/10.1111/j.1752-4598.2009.00063.x>
- 600 Stefanescu, C., & Traveset, A. (2009). Factors influencing the degree of generalization in flower use  
601 by Mediterranean butterflies. *Oikos*, 118(7), 1109-1117. <https://doi.org/10.1111/j.1600-0706.2009.17274.x>
- 603 Steffan-Dewenter, I. & Tscharntke, T. (1997). Early succession of butterfly and plant communities on  
604 set-aside fields. *Oecologia*, 109(2), 294-302. <https://doi.org/10.1007/s004420050087>
- 605 Steffan-Dewenter, I., & Leschke, K. (2003). Effects of habitat management on vegetation and above-  
606 ground nesting bees and wasps of orchard meadows in Central Europe. *Biodiversity &*  
607 *Conservation*, 12(9), 1953-1968. <https://doi.org/10.1023/A:1024199513365>
- 608 Tälle, M., H. Fogelfors, L. Westerberg, & Milberg, P. (2015). The conservation benefit of mowing vs  
609 grazing for management of species-rich grasslands: a multi-site, multi-year field experiment. *Nordic*  
610 *Journal of Botany*, 33(6), 761-768. <https://doi.org/10.1111/njb.00966>
- 611 Tälle, M., B. Deák, P. Poschlod, O. Valkó, L. Westerberg, & Milberg, P. (2016). Grazing vs. mowing:  
612 A meta-analysis of biodiversity benefits for grassland management. *Agriculture, Ecosystems &*  
613 *Environment*, 222, 200-212. <https://doi.org/10.1016/j.agee.2016.02.008>
- 614 Thomas, J. A. (1991). Rare species conservation: case studies of European butterflies. In: The  
615 scientific management of temperate communities for conservation (I.F. Spellerberg, F.B. Goldsmith &  
616 M.G. Morris, eds), pp. 149-197. Blackwell Scientific, Oxford.
- 617 Thomas, C. D., & Harrison, S. (1992). Spatial dynamics of a patchily distributed butterfly  
618 species. *Journal of Animal Ecology*, 437-446. <https://www.jstor.org/stable/5334>
- 619 Thomas, J. A. (2005). Monitoring change in the abundance and distribution of insects using butterflies  
620 and other indicator groups. *Philosophical Transactions of the Royal Society B: Biological*

- 621 *Sciences*, 360(1454), 339-357. <https://doi.org/10.1098/rstb.2004.1585>
- 622 Tschamtko, T., A.M. Klein, A. Krüss, I. Steffan-Dewenter, & Thies, C. (2005). Landscape  
623 perspectives on agricultural intensification and biodiversity–ecosystem service management. *Ecology*  
624 *letters*, 8(8), 857-874. <https://doi.org/10.1111/j.1461-0248.2005.00782.x>
- 625 Tylianakis, J. M., Laliberté, E., Nielsen, A., & Bascompte, J. (2010). Conservation of species  
626 interaction networks. *Biological conservation*, 143(10), 2270-2279.  
627 <https://doi.org/10.1016/j.biocon.2009.12.004>
- 628 Ubach, A., F. Páramo, C. Gutiérrez, & Stefanescu, C. (2019). Vegetation encroachment drives  
629 changes in the composition of butterfly assemblages and species loss in Mediterranean ecosystems. *Insect*  
630 *Conservation and Diversity*, 13(2), 151-161. <https://doi.org/10.1111/icad.12397>
- 631 Uchida, K., & Ushimaru, A. (2015). Land abandonment and intensification diminish spatial and  
632 temporal  $\beta$  diversity of grassland plants and herbivorous insects within paddy terraces. *Journal of*  
633 *Applied Ecology*, 52(4), 1033-1043.
- 634 Uchida, K., T. F. Koyanagi, T. Matsumura, & Koyama, A. (2018). Patterns of plant diversity loss and  
635 species turnover resulting from land abandonment and intensification in semi-natural grasslands. *Journal*  
636 *of environmental management*, 218, 622-629. <https://doi.org/10.1111/1365-2664.12443>
- 637 Valiente-Banuet, A., Aizen, M. A., Alcántara, J. M., Arroyo, J., Cocucci, A., Galetti, M., Garcia,  
638 M.B., Garcia, D., Gomez, J. M., Jordano, P., Medel, R., Navarro, L., Obeso, J., Oviedo, R., Ramirez, N.,  
639 Rey, P.J., Traveset, A., Verdú, M. & Zamora, R. (2015). Beyond species loss: the extinction of ecological  
640 interactions in a changing world. *Functional Ecology*, 29(3), 299-307.
- 641 Vila, R., Stefanescu C., Sesma J.M. (2018). Guia de les papallones diürnes de Catalunya. Barcelona,  
642 Spain: Lynx edicions.
- 643 Watkinson, A. R., & Ormerod, S. J. (2001). Grasslands, grazing and biodiversity: editors'  
644 introduction. *Journal of applied ecology*, 233-237. <https://www.jstor.org/stable/2655793>
- 645 Walker, B. (1995). Conserving biological diversity through ecosystem resilience. *Conservation*  
646 *biology*, 9(4), 747-752. <https://doi.org/10.1046/j.1523-1739.1995.09040747.x>
- 647 Zabel, F., R. Delzeit, J. M. Schneider, R. Seppel, W. Mauser & Václavík, T. (2019). Global impacts of  
648 future cropland expansion and intensification on agricultural markets and biodiversity. *Nature*  
649 *communications*, 10(1), 1-10. <https://doi.org/10.1038/s41467-019-10775-z>
- 650 Zobel, M., M. Suurkask, E. Rosén, & Pärtel, M. (1996). The dynamics of species richness in an  
651 experimentally restored calcareous grassland. *Journal of Vegetation Science*, 7(2), 203-210.  
652 <https://doi.org/10.2307/3236320>

653 **Appendix A. Supplementary data.**

654

655 **Table A1.** Butterfly community dissimilarity trends in the analysed periods. Beta coefficients and *P*  
 656 values are given.

|                                                                                                           | Study period<br>(1997–2018) |                                                  | Abandonment<br>(1998–2004)                       |                                                  | Management recovery<br>(2004–2018)               |                                                   |
|-----------------------------------------------------------------------------------------------------------|-----------------------------|--------------------------------------------------|--------------------------------------------------|--------------------------------------------------|--------------------------------------------------|---------------------------------------------------|
|                                                                                                           |                             |                                                  | Abandoned                                        | Managed                                          | Grazing                                          | Graz. + mown                                      |
| <b>Butterfly community<br/>dissimilarity trend</b><br>(Bray-Curtis dissimilarity with<br>respect to 1997) | S1                          | $\beta = \mathbf{0.008}$<br>$P < \mathbf{0.001}$ | $\beta = \mathbf{0.012}$<br>$P = \mathbf{0.021}$ |                                                  | $\beta = \mathbf{0.004}$<br>$P = \mathbf{0.007}$ |                                                   |
|                                                                                                           | S2                          | $\beta < -0.001$<br>$P = 0.729$                  | $\beta = \mathbf{0.025}$<br>$P = \mathbf{0.019}$ |                                                  |                                                  | $\beta = -0.004$<br>$P = 0.173$                   |
|                                                                                                           | S3                          | $\beta < -0.001$<br>$P = 0.836$                  | $\beta = \mathbf{0.021}$<br>$P = \mathbf{0.016}$ |                                                  |                                                  | $\beta = -0.002$<br>$P = 0.145$                   |
|                                                                                                           | S4                          | $\beta = -0.002$<br>$P = 0.152$                  | $\beta = \mathbf{0.007}$<br>$P = \mathbf{0.31}$  |                                                  |                                                  | $\beta = < -0.001$<br>$P = 0.916$                 |
|                                                                                                           | S5                          | $\beta = -0.002$<br>$P = 0.268$                  | $\beta = \mathbf{0.027}$<br>$P = \mathbf{0.011}$ |                                                  |                                                  | $\beta = \mathbf{-0.006}$<br>$P = \mathbf{0.012}$ |
|                                                                                                           | S6                          | $\beta = \mathbf{0.003}$<br>$P = \mathbf{0.047}$ |                                                  | $\beta = \mathbf{0.016}$<br>$P = \mathbf{0.002}$ |                                                  | $\beta = -0.002$<br>$P = 0.499$                   |
|                                                                                                           | GLM*                        |                                                  | $F = 0.219; P = 0.649$                           |                                                  | $F = \mathbf{15.14}; P < \mathbf{0.001}$         |                                                   |

657

658

659

660

661 **Table A2.** PERMANOVA results for the butterfly community between periods: (A): before  
 662 abandonment\*; (B) abandonment; (C) management recovery. \* 1999 was included in this period as  
 663 butterfly communities were still very similar to the initial situation due to the inertia in changes in plant  
 664 composition in the first year after abandonment (see Figure 6).  
 665

| Section | Treatment                   | PERMANOVA analysis               | A vs B                        | A vs C                        | B vs C                           |
|---------|-----------------------------|----------------------------------|-------------------------------|-------------------------------|----------------------------------|
| 1       | Abandoned<br>Only-grazed    | <b><math>P &lt; 0.001</math></b> | <b><math>P = 0.045</math></b> | <b><math>P = 0.005</math></b> | <b><math>P &lt; 0.001</math></b> |
| 2       | Abandoned<br>Mowing-grazing | <b><math>P = 0.009</math></b>    | $P = 0.158$                   | $P = 1$                       | <b><math>P = 0.015</math></b>    |
| 3       | Abandoned<br>Mowing-grazing | <b><math>P = 0.001</math></b>    | $P = 0.096$                   | $P = 0.334$                   | <b><math>P = 0.001</math></b>    |
| 4       | Abandoned<br>Mowing-grazing | <b><math>P &lt; 0.001</math></b> | $P = 0.164$                   | $P = 0.052$                   | <b><math>P = 0.001</math></b>    |
| 5       | Abandoned<br>Mowing-grazing | <b><math>P = 0.001</math></b>    | $P = 0.052$                   | $P = 1$                       | <b><math>P &lt; 0.001</math></b> |
| 6       | Managed<br>Mowing-grazing   | <b><math>P = 0.018</math></b>    | $P = 0.105$                   | $P = 0.084$                   | <b><math>P = 0.006</math></b>    |

666

667 **Figure A1.** Study area. Transect sections in Closes de Tec, Aiguamolls de l'Empordà Natural Park.

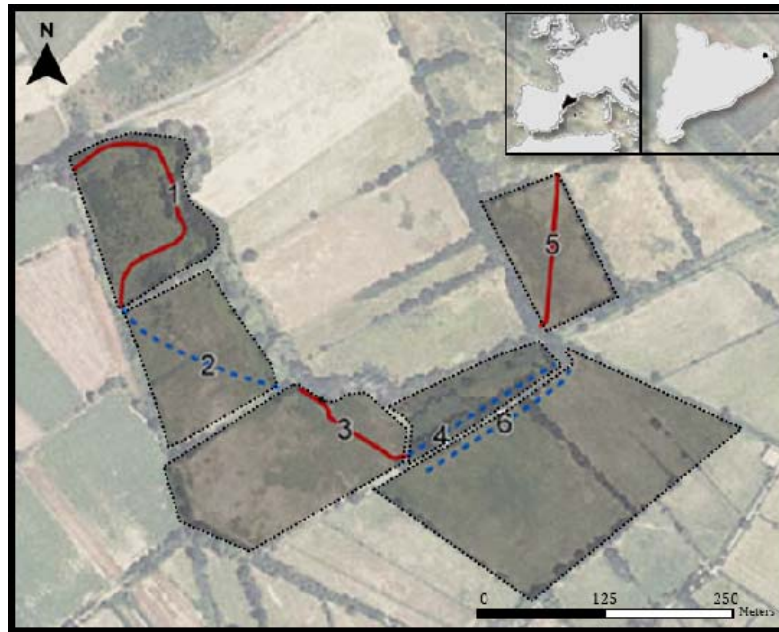

668

669 **Figure A2.** Type of management in the sections during the study period. Circles indicate episodes of  
670 grazing and crosses indicate mowing. As of 1999, sections 1–5 were abandoned; section 6 continued to be  
671 managed throughout the whole study period. Management was restored in 2005 in the abandoned  
672 meadows, although, while sections 2–5 combined grazing and mowing, section 1 was managed  
673 exclusively by grazing.

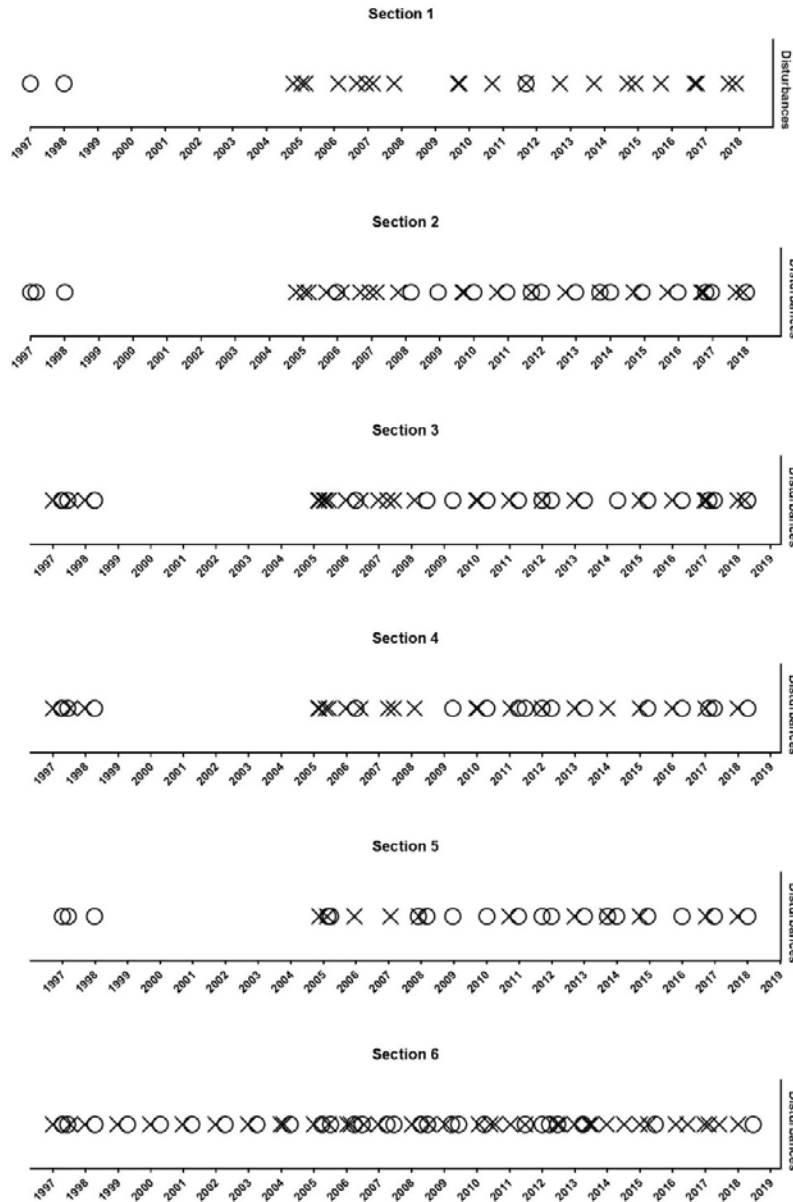

674



675 **Figure A3.** Habitat cover present along the different sections in 2000, 2006, 2012 and 2018. Habitat types  
676 characterized according to the CORINE Land Cover manual.

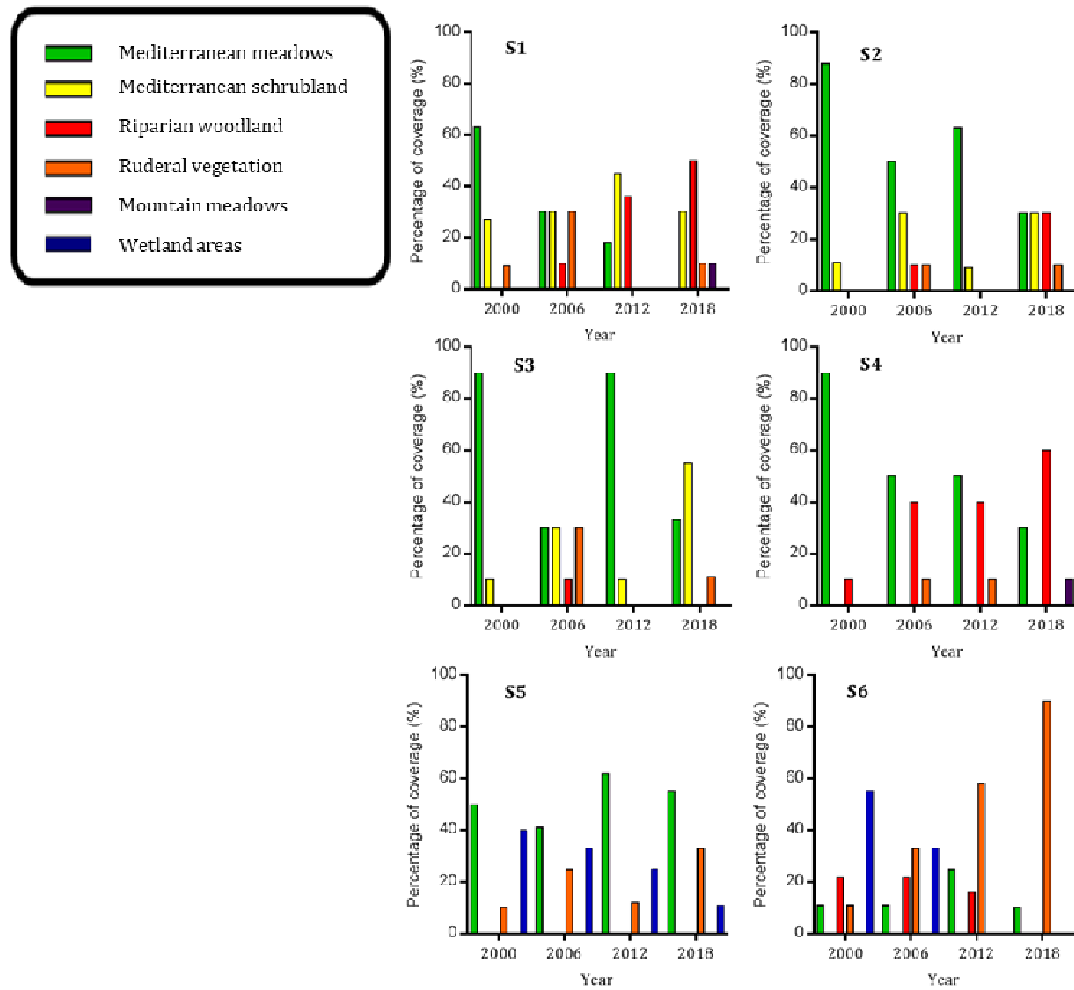

677  
678

679 **Figure A4.** Continuous lines indicate trends for the eight ecological descriptors analysed in section 1.  
680 Dashed lines indicate trends for the total of all six sections. Significant trends ( $P < 0.05$ ) are represented  
681 by small dotted lines.

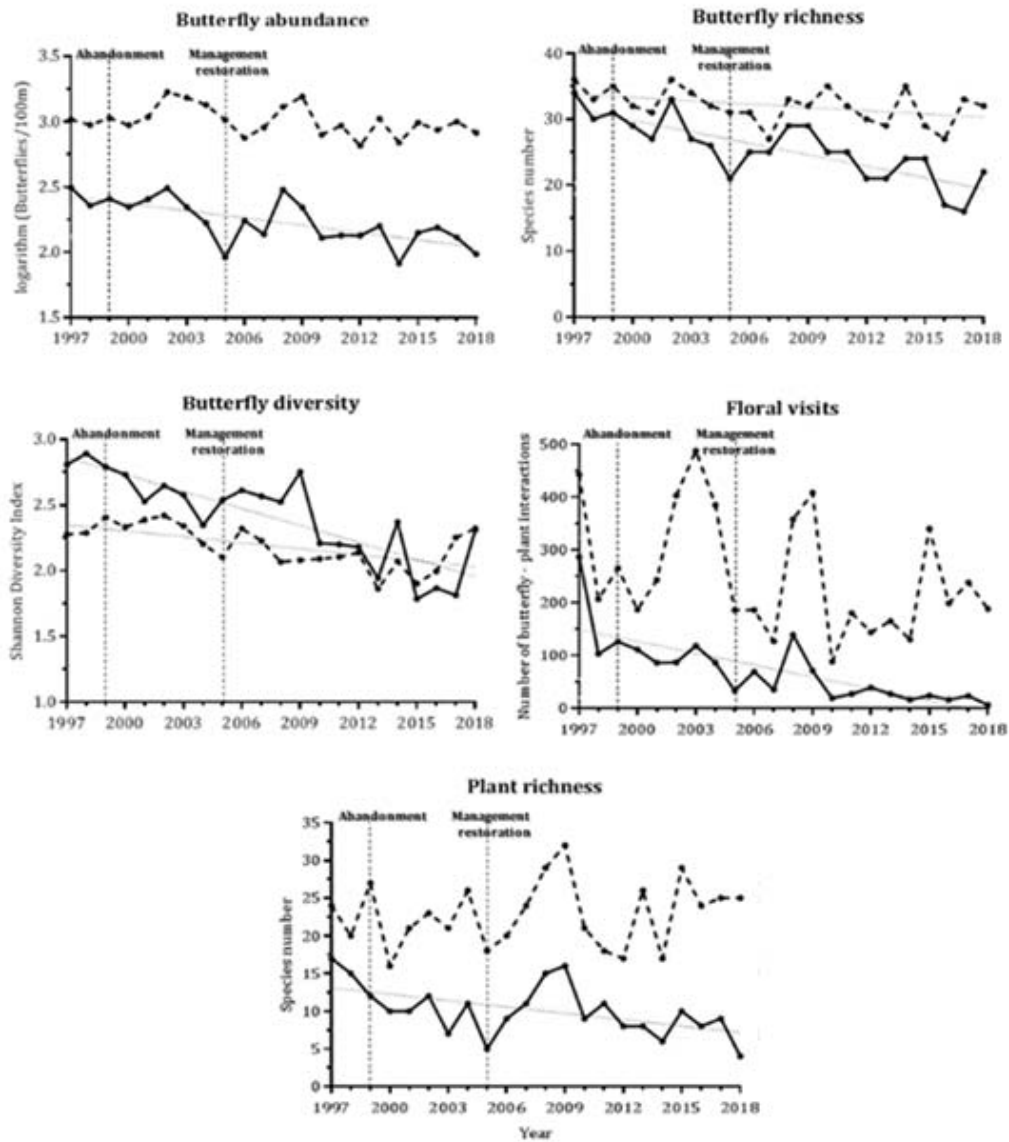

682

683 **Figure A5.** Population trends of the most sensitive plant species to management changes according to a  
684 Simper analysis. Trends for the totals for the five abandoned sections.

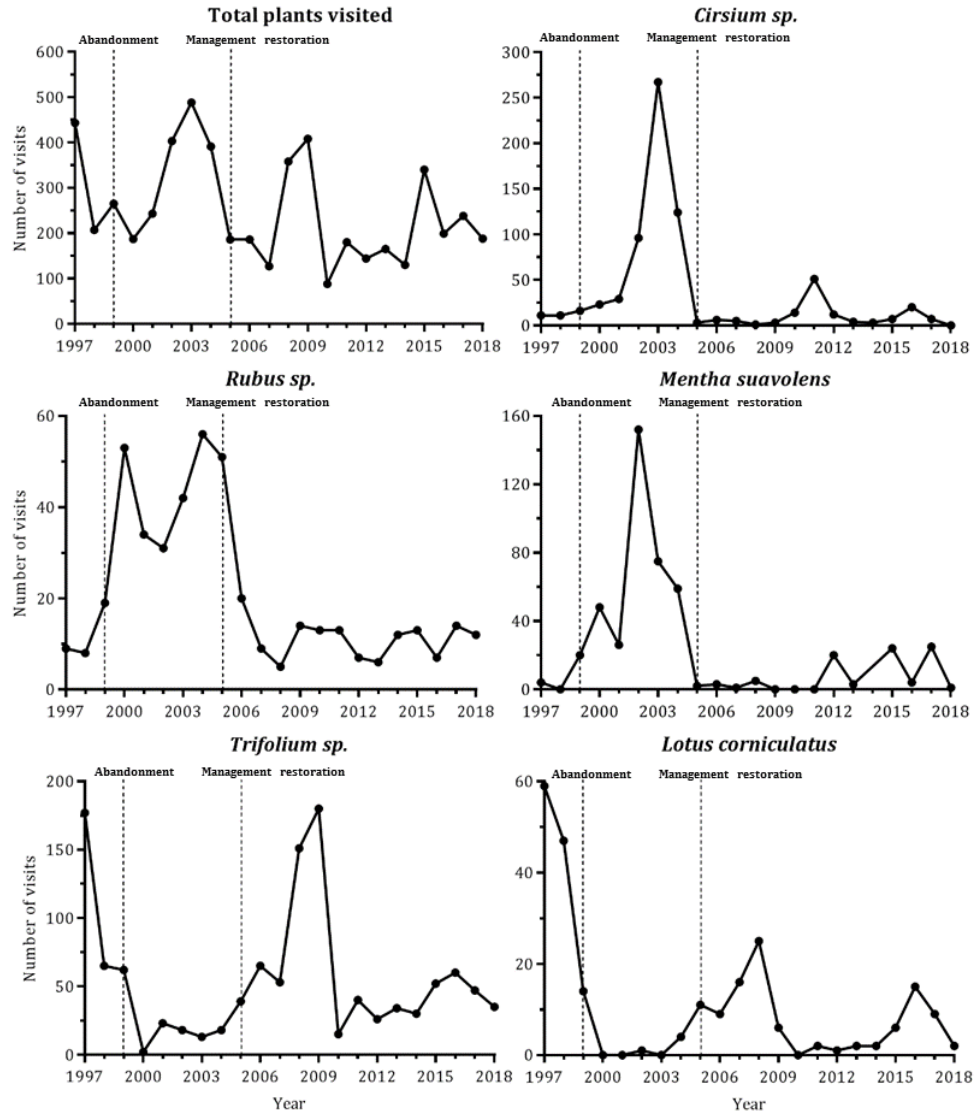

685

686

687 **Figure A6.** Population trends of the most sensitive butterfly species to management changes according to  
688 a Simper analysis. Blue lines show the trends in species in abandoned sections (1–5) and red lines trends  
689 in species in section 6.

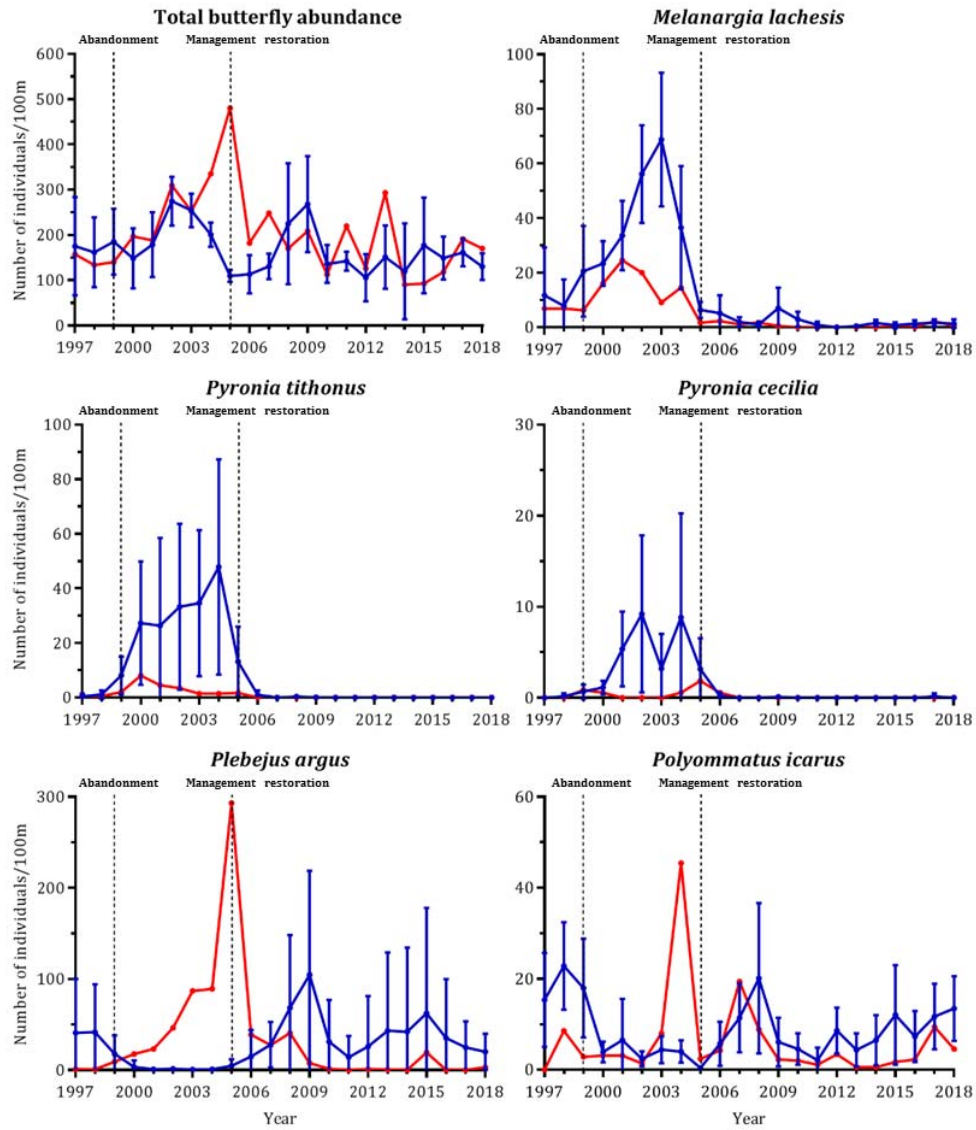

690
